# Supplementary material for: Modulating factors of the abundance and distribution of Achelous spinimanus (Latreille, 1819) (Decapoda, Portunoidea), a fishery resource, in Southeastern Brazil
Source: PeerJ. 2018 Oct 10;6:e5720. doi: 10.7717/peerj.5720 (PMC6186155; doi:10.7717/peerj.5720)
Supplement: Supplemental Information 2 [file peerj-06-5720-s002.xlsx]

## Sheet: Plan1
Year	Month	Season	Bay	Area	Sampling sites (m)	Bottom Temperature ( °C )	Surface Temperature ( °C )	Bottom Salinity	Percentage Organic matter	Phi
1998	1998-01-01	Summer	Ubatumirim	Exposed	10m	26.7	30.5	35.5	1.8	4
1998	1998-01-01	Summer	Mar Virado	Exposed	10m	24.5	28.4	36	10.3	5.84
1998	1998-01-01	Summer	Ubatuba	Exposed	10m	27.8	28	36	10.3	4.83
1998	1998-01-01	Summer	Ubatumirim	Sheltered	10m	19.7	29.2	36	2.8	4.42
1998	1998-01-01	Summer	Ubatumirim	Exposed	15m	18.2	29.7	35	5.3	3.84
1998	1998-01-01	Summer	Mar Virado	Sheltered	10m	23.4	29	36	3.6	6.18
1998	1998-01-01	Summer	Ubatuba	Sheltered	10m	25	28	36	7.1	5.29
1998	1998-01-01	Summer	Mar Virado	Exposed	15m	20.3	29	36	8.7	5.73
1998	1998-01-01	Summer	Mar Virado	Exposed	20m	17.3	29	36	1.1	4.28
1998	1998-01-01	Summer	Ubatuba	Exposed	15m	21	28.2	36	8.1	3.99
1998	1998-01-01	Summer	Mar Virado	Sheltered	5m	26	30	36	6.4	5.93
1998	1998-01-01	Summer	Ubatuba	Exposed	20m	18.2	26.7	36	5.1	3.21
1998	1998-01-01	Summer	Mar Virado	Sheltered	7,5m	25.1	28	36	1.6	5.37
1998	1998-01-01	Summer	Ubatumirim	Exposed	20m	16.7	29.5	35.5	6	1.53
1998	1998-01-01	Summer	Ubatumirim	Sheltered	5m	28	31	35	3.8	4.88
1998	1998-01-01	Summer	Ubatuba	Sheltered	5m	28.5	30	35	3.8	5.74
1998	1998-01-01	Summer	Ubatumirim	Sheltered	7,5m	27.2	29.5	36	2.5	4.45
1998	1998-01-01	Summer	Ubatuba	Sheltered	7,5m	25.5	28.2	36	2.5	3.61
1998	1998-02-01	Summer	Ubatuba	Exposed	10m	28	29.5	35	10.3	4.83
1998	1998-02-01	Summer	Mar Virado	Exposed	10m	27.5	29	35	10.3	5.84
1998	1998-02-01	Summer	Ubatumirim	Exposed	10m	28	30	36	1.8	4
1998	1998-02-01	Summer	Ubatuba	Sheltered	10m	27	29.5	34	7.1	5.29
1998	1998-02-01	Summer	Ubatumirim	Sheltered	10m	26.7	29.3	35	2.8	4.42
1998	1998-02-01	Summer	Mar Virado	Sheltered	10m	27.5	29.8	35	3.6	6.18
1998	1998-02-01	Summer	Ubatumirim	Exposed	15m	26	29.5	36	5.3	3.84
1998	1998-02-01	Summer	Ubatuba	Exposed	15m	25.3	29.5	35	8.1	3.99
1998	1998-02-01	Summer	Ubatuba	Exposed	20m	24	28.8	35	5.1	3.21
1998	1998-02-01	Summer	Mar Virado	Exposed	15m	26.5	28.7	35.7	8.7	5.73
1998	1998-02-01	Summer	Mar Virado	Exposed	20m	24.5	28.8	36	1.1	4.28
1998	1998-02-01	Summer	Ubatumirim	Exposed	20m	25	29	36	6	1.53
1998	1998-02-01	Summer	Mar Virado	Sheltered	5m	28	30	35	6.4	5.93
1998	1998-02-01	Summer	Ubatumirim	Sheltered	5m	28	30.2	35	3.8	4.88
1998	1998-02-01	Summer	Ubatuba	Sheltered	5m	28.7	30	34	3.8	5.74
1998	1998-02-01	Summer	Ubatumirim	Sheltered	7,5m	27.8	29.5	35	2.5	4.45
1998	1998-02-01	Summer	Ubatuba	Sheltered	7,5m	27	30.2	35	2.5	3.61
1998	1998-02-01	Summer	Mar Virado	Sheltered	7,5m	29.7	30	35	1.6	5.37
1998	1998-03-01	Summer	Ubatumirim	Exposed	10m	26.6	27.9	34.7	1.8	4
1998	1998-03-01	Summer	Mar Virado	Exposed	10m	26.9	27.6	35	10.3	5.84
1998	1998-03-01	Summer	Mar Virado	Sheltered	10m	26.5	28	34.7	3.6	6.18
1998	1998-03-01	Summer	Ubatumirim	Sheltered	10m	24.4	27.5	35	2.8	4.42
1998	1998-03-01	Summer	Ubatumirim	Exposed	15m	22.5	27.8	35	5.3	3.84
1998	1998-03-01	Summer	Ubatuba	Exposed	10m	27.5	28	35	10.3	4.83
1998	1998-03-01	Summer	Mar Virado	Exposed	15m	21.8	27.3	35	8.7	5.73
1998	1998-03-01	Summer	Ubatumirim	Exposed	20m	20	27.8	36	6	1.53
1998	1998-03-01	Summer	Ubatumirim	Sheltered	5m	26.5	28.2	35	3.8	4.88
1998	1998-03-01	Summer	Mar Virado	Exposed	20m	21.5	27.2	35	1.1	4.28
1998	1998-03-01	Summer	Mar Virado	Sheltered	5m	26.8	28.7	35	6.4	5.93
1998	1998-03-01	Summer	Mar Virado	Sheltered	7,5m	27	28.5	34	1.6	5.37
1998	1998-03-01	Summer	Ubatumirim	Sheltered	7,5m	27	28.2	34	2.5	4.45
1998	1998-03-01	Summer	Ubatuba	Sheltered	10m	27.7	28.2	35	7.1	5.29
1998	1998-03-01	Summer	Ubatuba	Exposed	15m	27.1	28	35	8.1	3.99
1998	1998-03-01	Summer	Ubatuba	Exposed	20m	25.1	27.2	35	5.1	3.21
1998	1998-03-01	Summer	Ubatuba	Sheltered	5m	28.1	28.2	35	3.8	5.74
1998	1998-03-01	Summer	Ubatuba	Sheltered	7,5m	27.4	28	35	2.5	3.61
1998	1998-04-01	Autumn	Ubatumirim	Exposed	10m	25.9	27.8	34	3.5	4
1998	1998-04-01	Autumn	Ubatuba	Exposed	10m	23.5	27	35	12.6	4.83
1998	1998-04-01	Autumn	Mar Virado	Exposed	10m	25	26	35	2.2	5.84
1998	1998-04-01	Autumn	Ubatumirim	Sheltered	10m	22.9	27.9	35	10.5	4.42
1998	1998-04-01	Autumn	Ubatuba	Sheltered	10m	22.8	27.6	36	15.4	5.29
1998	1998-04-01	Autumn	Ubatuba	Exposed	15m	23	27.1	35	5	3.99
1998	1998-04-01	Autumn	Ubatumirim	Exposed	15m	22	27	35	1.5	3.84
1998	1998-04-01	Autumn	Ubatuba	Exposed	20m	21.5	26.5	36	0.7	3.21
1998	1998-04-01	Autumn	Ubatuba	Sheltered	5m	24.5	27.5	35	10.4	5.74
1998	1998-04-01	Autumn	Ubatumirim	Exposed	20m	21.1	26.9	35	2.4	1.53
1998	1998-04-01	Autumn	Mar Virado	Sheltered	10m	24.5	26.6	35	6.2	6.18
1998	1998-04-01	Autumn	Ubatuba	Sheltered	7,5m	22.5	27.3	35	10.3	3.61
1998	1998-04-01	Autumn	Mar Virado	Exposed	15m	24.6	26.1	35	5.9	5.73
1998	1998-04-01	Autumn	Ubatumirim	Sheltered	5m	25	27.3	35	4.9	4.88
1998	1998-04-01	Autumn	Mar Virado	Exposed	20m	21.7	26.5	35	7.2	4.28
1998	1998-04-01	Autumn	Mar Virado	Sheltered	5m	25.2	27	35	7.4	5.93
1998	1998-04-01	Autumn	Ubatumirim	Sheltered	7,5m	24.4	26.9	34.7	5.5	4.45
1998	1998-04-01	Autumn	Mar Virado	Sheltered	7,5m	27	26.9	35	4	5.37
1998	1998-05-01	Autumn	Ubatuba	Exposed	10m	24.2	25	35	12.6	4.83
1998	1998-05-01	Autumn	Ubatumirim	Exposed	10m	24.8	25	35	3.5	4
1998	1998-05-01	Autumn	Ubatuba	Sheltered	10m	23	24	35	15.4	5.29
1998	1998-05-01	Autumn	Mar Virado	Exposed	10m	24.1	24.9	35	2.2	5.84
1998	1998-05-01	Autumn	Ubatumirim	Sheltered	10m	24.2	24.5	34.7	10.5	4.42
1998	1998-05-01	Autumn	Mar Virado	Sheltered	10m	24.1	24.8	35	6.2	6.18
1998	1998-05-01	Autumn	Mar Virado	Exposed	15m	24.1	24.5	35	5.9	5.73
1998	1998-05-01	Autumn	Mar Virado	Exposed	20m	24.5	24.2	36	7.2	4.28
1998	1998-05-01	Autumn	Ubatuba	Exposed	15m	24	25	35.3	5	3.99
1998	1998-05-01	Autumn	Ubatumirim	Exposed	15m	24.1	25.1	35	1.5	3.84
1998	1998-05-01	Autumn	Ubatuba	Exposed	20m	24.2	24	35	0.7	3.21
1998	1998-05-01	Autumn	Ubatuba	Sheltered	5m	24.2	24	35	10.4	5.74
1998	1998-05-01	Autumn	Mar Virado	Sheltered	5m	24.1	24.8	35	7.4	5.93
1998	1998-05-01	Autumn	Mar Virado	Sheltered	7,5m	24.2	24.6	34.7	4	5.37
1998	1998-05-01	Autumn	Ubatumirim	Exposed	20m	23.9	24.2	36	2.4	1.53
1998	1998-05-01	Autumn	Ubatuba	Sheltered	7,5m	24.5	24.5	35	10.3	3.61
1998	1998-05-01	Autumn	Ubatumirim	Sheltered	5m	24.5	24.5	35	4.9	4.88
1998	1998-05-01	Autumn	Ubatumirim	Sheltered	7,5m	24.9	24.9	35.7	5.5	4.45
1998	1998-06-01	Autumn	Mar Virado	Exposed	10m	22.5	22.8	35	2.2	5.84
1998	1998-06-01	Autumn	Mar Virado	Sheltered	10m	22.8	23	35	6.2	6.18
1998	1998-06-01	Autumn	Mar Virado	Exposed	15m	22.1	22.2	34	5.9	5.73
1998	1998-06-01	Autumn	Ubatumirim	Exposed	10m	23	23	35	3.5	4
1998	1998-06-01	Autumn	Mar Virado	Exposed	20m	22.2	22.2	35	7.2	4.28
1998	1998-06-01	Autumn	Mar Virado	Sheltered	5m	22.3	23	35	7.4	5.93
1998	1998-06-01	Autumn	Ubatumirim	Sheltered	10m	23	23	35.3	10.5	4.42
1998	1998-06-01	Autumn	Mar Virado	Sheltered	7,5m	22.5	23	35	4	5.37
1998	1998-06-01	Autumn	Ubatumirim	Exposed	15m	22.5	22.7	35	1.5	3.84
1998	1998-06-01	Autumn	Ubatuba	Exposed	10m	23	23.1	36	12.6	4.83
1998	1998-06-01	Autumn	Ubatuba	Sheltered	10m	23	23	35.3	15.4	5.29
1998	1998-06-01	Autumn	Ubatuba	Exposed	15m	23	23.5	36	5	3.99
1998	1998-06-01	Autumn	Ubatumirim	Exposed	20m	22.8	22.4	35	2.4	1.53
1998	1998-06-01	Autumn	Ubatuba	Exposed	20m	23	23	36	0.7	3.21
1998	1998-06-01	Autumn	Ubatuba	Sheltered	5m	23	23.3	36	10.4	5.74
1998	1998-06-01	Autumn	Ubatumirim	Sheltered	5m	22.8	23	35	4.9	4.88
1998	1998-06-01	Autumn	Ubatuba	Sheltered	7,5m	23	22.7	36	10.3	3.61
1998	1998-06-01	Autumn	Ubatumirim	Sheltered	7,5m	23	24	35	5.5	4.45
1998	1998-07-01	Winter	Ubatumirim	Exposed	10m	21.5	22	35	1.1	4
1998	1998-07-01	Winter	Ubatumirim	Sheltered	10m	21	21.7	35	5.5	4.42
1998	1998-07-01	Winter	Ubatumirim	Exposed	15m	21.5	21.5	35	1.5	3.84
1998	1998-07-01	Winter	Ubatuba	Exposed	10m	22	22.1	35	13	4.83
1998	1998-07-01	Winter	Mar Virado	Exposed	10m	21.8	22	33.3	1.5	5.84
1998	1998-07-01	Winter	Ubatumirim	Exposed	20m	21	21.6	35	1.1	1.53
1998	1998-07-01	Winter	Ubatumirim	Sheltered	5m	21.2	22	36	4.6	4.88
1998	1998-07-01	Winter	Ubatumirim	Sheltered	7,5m	21.5	21.9	35	2.1	4.45
1998	1998-07-01	Winter	Mar Virado	Sheltered	10m	22	22.1	32	9.2	6.18
1998	1998-07-01	Winter	Mar Virado	Exposed	15m	22	22	32.7	1.5	5.73
1998	1998-07-01	Winter	Ubatuba	Sheltered	10m	22.2	22.6	35	11.3	5.29
1998	1998-07-01	Winter	Mar Virado	Exposed	20m	21.4	22	32	1	4.28
1998	1998-07-01	Winter	Ubatuba	Exposed	15m	22	22	35	1	3.99
1998	1998-07-01	Winter	Ubatuba	Exposed	20m	21.3	22	36	1	3.21
1998	1998-08-01	Winter	Ubatuba	Exposed	20m	22.2	23	34	1	3.21
1998	1998-07-01	Winter	Mar Virado	Sheltered	5m	22.5	23	31.7	5.6	5.93
1998	1998-07-01	Winter	Ubatuba	Sheltered	7,5m	22	22.5	34.3	10.1	3.61
1998	1998-07-01	Winter	Mar Virado	Sheltered	7,5m	22.5	22.6	32	5.3	5.37
1998	1998-08-01	Winter	Ubatumirim	Exposed	10m	23.3	24.7	34.3	1.1	4
1998	1998-08-01	Winter	Mar Virado	Exposed	10m	22.7	23	35.3	1.5	5.84
1998	1998-08-01	Winter	Mar Virado	Sheltered	10m	22.6	23	35.7	9.2	6.18
1998	1998-08-01	Winter	Ubatuba	Exposed	10m	23	24.2	33.3	13	4.83
1998	1998-08-01	Winter	Ubatumirim	Sheltered	10m	23	24.2	35	5.5	4.42
1998	1998-08-01	Winter	Mar Virado	Exposed	15m	22	22.7	36	1.5	5.73
1998	1998-08-01	Winter	Ubatuba	Sheltered	10m	22.7	24.4	33	11.3	5.29
1998	1998-08-01	Winter	Mar Virado	Exposed	20m	22.2	22.3	35.3	1	4.28
1998	1998-08-01	Winter	Ubatumirim	Exposed	15m	22.2	23.2	35.3	1.5	3.84
1998	1998-08-01	Winter	Mar Virado	Sheltered	5m	23	23.2	35.3	5.6	5.93
1998	1998-08-01	Winter	Ubatuba	Exposed	15m	23.1	24.1	33	1	3.99
1998	1998-07-01	Winter	Ubatuba	Sheltered	5m	22.5	23	34.7	3.4	5.74
1998	1998-08-01	Winter	Ubatuba	Sheltered	5m	23.2	24.4	33	3.4	5.74
1998	1998-08-01	Winter	Ubatuba	Sheltered	7,5m	23.1	24.1	33.7	10.1	3.61
1998	1998-08-01	Winter	Mar Virado	Sheltered	7,5m	23.2	23.7	35	5.3	5.37
1998	1998-08-01	Winter	Ubatumirim	Exposed	20m	22	22.8	35	1.1	1.53
1998	1998-08-01	Winter	Ubatumirim	Sheltered	5m	24.5	24.2	34	4.6	4.88
1998	1998-08-01	Winter	Ubatumirim	Sheltered	7,5m	24	24.2	34.7	2.1	4.45
1998	1998-09-01	Winter	Mar Virado	Exposed	10m	22.6	23	35	1.5	5.84
1998	1998-09-01	Winter	Ubatumirim	Exposed	10m	22.2	22.5	34	1.1	4
1998	1998-09-01	Winter	Ubatumirim	Sheltered	10m	22.2	22.3	34	5.5	4.42
1998	1998-09-01	Winter	Ubatuba	Exposed	10m	22.7	23.2	31.3	13	4.83
1998	1998-09-01	Winter	Ubatumirim	Exposed	15m	22	22.2	34	1.5	3.84
1998	1998-09-01	Winter	Ubatumirim	Exposed	20m	22	21.8	34	1.1	1.53
1998	1998-09-01	Winter	Ubatuba	Sheltered	10m	22.3	23.7	32.7	11.3	5.29
1998	1998-09-01	Winter	Ubatuba	Exposed	15m	22.3	23	32	1	3.99
1998	1998-09-01	Winter	Ubatuba	Exposed	20m	22.2	22	33.7	1	3.21
1998	1998-09-01	Winter	Mar Virado	Sheltered	10m	22.9	23.4	32.7	9.2	6.18
1998	1998-09-01	Winter	Ubatumirim	Sheltered	5m	22.7	22.9	34	4.6	4.88
1998	1998-09-01	Winter	Ubatuba	Sheltered	5m	23	24	31.3	3.4	5.74
1998	1998-09-01	Winter	Mar Virado	Exposed	15m	23.7	23.7	33	1.5	5.73
1998	1998-09-01	Winter	Ubatumirim	Sheltered	7,5m	22.9	23	34	2.1	4.45
1998	1998-09-01	Winter	Mar Virado	Exposed	20m	21.5	22.5	35	1	4.28
1998	1998-09-01	Winter	Ubatuba	Sheltered	7,5m	22.3	23	30.3	10.1	3.61
1998	1998-09-01	Winter	Mar Virado	Sheltered	5m	23	23.2	32	5.6	5.93
1998	1998-09-01	Winter	Mar Virado	Sheltered	7,5m	23.3	24.7	32	5.3	5.37
1998	1998-10-01	Spring	Mar Virado	Exposed	10m	21	21.5	31.8	1.7	5.84
1998	1998-10-01	Spring	Mar Virado	Sheltered	10m	21.2	22.5	33	4.6	6.18
1998	1998-10-01	Spring	Mar Virado	Exposed	15m	21.6	21.9	31.5	4.4	5.73
1998	1998-10-01	Spring	Ubatumirim	Exposed	10m	22.3	23	30	3.3	4
1998	1998-10-01	Spring	Ubatumirim	Sheltered	10m	22.7	23	31	5.2	4.42
1998	1998-10-01	Spring	Mar Virado	Exposed	20m	21	22	32	0.3	4.28
1998	1998-10-01	Spring	Mar Virado	Sheltered	5m	21.6	22	32	4.4	5.93
1998	1998-10-01	Spring	Mar Virado	Sheltered	7,5m	21.6	22.2	32	2.5	5.37
1998	1998-10-01	Spring	Ubatuba	Exposed	10m	22.9	22.9	30.7	2.3	4.83
1998	1998-10-01	Spring	Ubatumirim	Exposed	15m	21.5	22	32	3.6	3.84
1998	1998-10-01	Spring	Ubatuba	Sheltered	10m	22.3	21.7	31	4	5.29
1998	1998-10-01	Spring	Ubatuba	Exposed	15m	22.2	23	32	2.1	3.99
1998	1998-10-01	Spring	Ubatumirim	Exposed	20m	21.5	22	32	0.9	1.53
1998	1998-10-01	Spring	Ubatumirim	Sheltered	5m	22	23	30.7	2.2	4.88
1998	1998-10-01	Spring	Ubatuba	Exposed	20m	22	22.5	31.3	2.3	3.21
1998	1998-10-01	Spring	Ubatuba	Sheltered	5m	22.9	25.7	30.7	3	5.74
1998	1998-10-01	Spring	Ubatumirim	Sheltered	7,5m	23	23.8	30	8.2	4.45
1998	1998-10-01	Spring	Ubatuba	Sheltered	7,5m	23.2	23.3	30.7	6.7	3.61
1998	1998-11-01	Spring	Ubatumirim	Exposed	10m	22.7	23.2	35	3.3	4
1998	1998-11-01	Spring	Mar Virado	Exposed	10m	21	22.1	35	1.7	5.84
1998	1998-11-01	Spring	Ubatuba	Exposed	10m	22.5	23.8	35	2.3	4.83
1998	1998-11-01	Spring	Mar Virado	Sheltered	10m	21	22.1	34.7	4.6	6.18
1998	1998-11-01	Spring	Mar Virado	Exposed	15m	20.7	22	35.7	4.4	5.73
1998	1998-11-01	Spring	Ubatumirim	Sheltered	10m	21	24.2	35	5.2	4.42
1998	1998-11-01	Spring	Mar Virado	Exposed	20m	18.9	21.9	36	0.3	4.28
1998	1998-11-01	Spring	Mar Virado	Sheltered	5m	21.5	22.2	35	4.4	5.93
1998	1998-11-01	Spring	Mar Virado	Sheltered	7,5m	21.7	22.2	34.3	2.5	5.37
1998	1998-11-01	Spring	Ubatuba	Sheltered	10m	22	24.7	35	4	5.29
1998	1998-11-01	Spring	Ubatuba	Exposed	15m	20	23.7	35	2.1	3.99
1998	1998-11-01	Spring	Ubatumirim	Exposed	15m	18.7	23.5	35	3.6	3.84
1998	1998-11-01	Spring	Ubatuba	Exposed	20m	22.2	23	35	2.3	3.21
1998	1998-11-01	Spring	Ubatumirim	Exposed	20m	22.2	21.9	35	0.9	1.53
1998	1998-11-01	Spring	Ubatumirim	Sheltered	5m	23	24.2	35	2.2	4.88
1998	1998-11-01	Spring	Ubatuba	Sheltered	5m	24	25.7	33	3	5.74
1998	1998-11-01	Spring	Ubatuba	Sheltered	7,5m	23	25.2	35	6.7	3.61
1998	1998-11-01	Spring	Ubatumirim	Sheltered	7,5m	24	23.7	35	8.2	4.45
1998	1998-12-01	Spring	Mar Virado	Exposed	10m	24.2	26.7	34	1.7	5.84
1998	1998-12-01	Spring	Ubatuba	Exposed	10m	27	23	35	2.3	4.83
1998	1998-12-01	Spring	Ubatumirim	Exposed	10m	25.7	28	35	3.3	4
1998	1998-12-01	Spring	Ubatumirim	Sheltered	10m	21.2	27.7	35	5.2	4.42
1998	1998-12-01	Spring	Ubatuba	Sheltered	10m	20.1	26.7	35	4	5.29
1998	1998-12-01	Spring	Ubatuba	Exposed	15m	19.2	25.3	35	2.1	3.99
1998	1998-12-01	Spring	Mar Virado	Sheltered	10m	22.2	25.2	34	4.6	6.18
1998	1998-12-01	Spring	Ubatumirim	Exposed	15m	18.5	28	35	3.6	3.84
1998	1998-12-01	Spring	Ubatuba	Exposed	20m	18	24.4	35.3	2.3	3.21
1998	1998-12-01	Spring	Mar Virado	Exposed	15m	20.8	25.2	34	4.4	5.73
1998	1998-12-01	Spring	Ubatuba	Sheltered	5m	24	26.2	35	3	5.74
1998	1998-12-01	Spring	Mar Virado	Exposed	20m	18	24.2	33	0.3	4.28
1998	1998-12-01	Spring	Ubatumirim	Exposed	20m	18.2	25	35	0.9	1.53
1998	1998-12-01	Spring	Mar Virado	Sheltered	5m	25	26.2	33	4.4	5.93
1998	1998-12-01	Spring	Mar Virado	Sheltered	7,5m	24.9	26	33	2.5	5.37
1998	1998-12-01	Spring	Ubatumirim	Sheltered	5m	24.7	28.2	35	2.2	4.88
1998	1998-12-01	Spring	Ubatumirim	Sheltered	7,5m	25.7	28.2	34.3	8.2	4.45
1998	1998-12-01	Spring	Ubatuba	Sheltered	7,5m	22	26.2	35	6.7	3.61
1999	1999-01-01	Summer	Ubatumirim	Exposed	10m	25.4	30	35	5.4	4
1999	1999-01-01	Summer	Ubatumirim	Sheltered	10m	20.7	30	35	7.5	4.42
1999	1999-01-01	Summer	Mar Virado	Exposed	10m	22.5	28.7	35	7.1	5.84
1999	1999-01-01	Summer	Ubatumirim	Exposed	15m	18.4	29	35.3	4.4	3.84
1999	1999-01-01	Summer	Mar Virado	Sheltered	10m	25.4	29.4	35	5.3	6.18
1999	1999-01-01	Summer	Mar Virado	Exposed	15m	19.7	27.7	35	3.7	5.73
1999	1999-01-01	Summer	Mar Virado	Exposed	20m	21.5	27.4	35	8	4.28
1999	1999-01-01	Summer	Ubatuba	Exposed	10m	28	30	35.3	5.8	4.83
1999	1999-01-01	Summer	Ubatumirim	Exposed	20m	17	28.4	35	4.4	1.53
1999	1999-01-01	Summer	Ubatuba	Sheltered	10m	26.7	29.7	35	4.4	5.29
1999	1999-01-01	Summer	Mar Virado	Sheltered	5m	27.7	29	34	3.2	5.93
1999	1999-01-01	Summer	Ubatumirim	Sheltered	5m	25	30.5	35	2.5	4.88
1999	1999-01-01	Summer	Ubatuba	Exposed	15m	25.2	30	35	4.6	3.99
1999	1999-01-01	Summer	Mar Virado	Sheltered	7,5m	22.8	29.4	34	2.9	5.37
1999	1999-01-01	Summer	Ubatuba	Exposed	20m	24	28.2	36	5.7	3.21
1999	1999-01-01	Summer	Ubatuba	Sheltered	5m	30	30	35	3.8	5.74
1999	1999-01-01	Summer	Ubatumirim	Sheltered	7,5m	28.3	31.4	35	2.3	4.45
1999	1999-01-01	Summer	Ubatuba	Sheltered	7,5m	28	29.5	35	2.7	3.61
1999	1999-02-01	Summer	Mar Virado	Exposed	10m	27.8	29	33.7	7.1	5.84
1999	1999-02-01	Summer	Ubatuba	Exposed	10m	28.4	28	33.3	5.8	4.83
1999	1999-02-01	Summer	Ubatumirim	Exposed	10m	28	29.3	35	5.4	4
1999	1999-02-01	Summer	Ubatuba	Sheltered	10m	27.2	28.7	34	4.4	5.29
1999	1999-02-01	Summer	Ubatumirim	Sheltered	10m	27.3	30	35	7.5	4.42
1999	1999-02-01	Summer	Ubatumirim	Exposed	15m	26.5	29	35	4.4	3.84
1999	1999-02-01	Summer	Mar Virado	Sheltered	10m	27.2	29.4	33.3	5.3	6.18
1999	1999-02-01	Summer	Ubatuba	Exposed	15m	26.5	27.7	35.3	4.6	3.99
1999	1999-02-01	Summer	Ubatumirim	Exposed	20m	25	27.8	35	4.4	1.53
1999	1999-02-01	Summer	Mar Virado	Exposed	15m	27.8	28.2	33.7	3.7	5.73
1999	1999-02-01	Summer	Mar Virado	Exposed	20m	24.2	28.2	35	8	4.28
1999	1999-02-01	Summer	Ubatumirim	Sheltered	5m	28.8	29.8	35	2.5	4.88
1999	1999-02-01	Summer	Mar Virado	Sheltered	5m	28.4	29	34	3.2	5.93
1999	1999-02-01	Summer	Mar Virado	Sheltered	7,5m	28.2	29.5	34.3	2.9	5.37
1999	1999-02-01	Summer	Ubatuba	Exposed	20m	25	27.7	35	5.7	3.21
1999	1999-02-01	Summer	Ubatuba	Sheltered	5m	28.7	29	35	3.8	5.74
1999	1999-02-01	Summer	Ubatuba	Sheltered	7,5m	28.4	28.8	34	2.7	3.61
1999	1999-02-01	Summer	Ubatumirim	Sheltered	7,5m	27	28.5	35	2.3	4.45
1999	1999-03-01	Summer	Ubatumirim	Exposed	10m	28.7	29	35	5.4	4
1999	1999-03-01	Summer	Mar Virado	Exposed	10m	27.2	30.7	31	7.1	5.84
1999	1999-03-01	Summer	Ubatuba	Exposed	10m	28.8	29.2	35	5.8	4.83
1999	1999-03-01	Summer	Ubatumirim	Sheltered	10m	26.8	29.2	35	7.5	4.42
1999	1999-03-01	Summer	Mar Virado	Sheltered	10m	26.2	30.8	33	5.3	6.18
1999	1999-03-01	Summer	Mar Virado	Exposed	15m	25.2	29.2	33.3	3.7	5.73
1999	1999-03-01	Summer	Ubatuba	Sheltered	10m	26.8	29.7	35	4.4	5.29
1999	1999-03-01	Summer	Ubatumirim	Exposed	15m	24.7	28.8	35	4.4	3.84
1999	1999-03-01	Summer	Mar Virado	Exposed	20m	23.7	28.7	32.7	8	4.28
1999	1999-03-01	Summer	Ubatuba	Exposed	15m	27.4	29.2	34.3	4.6	3.99
1999	1999-03-01	Summer	Ubatumirim	Exposed	20m	22	29.4	36	4.4	1.53
1999	1999-03-01	Summer	Ubatumirim	Sheltered	5m	28.2	30	35	2.5	4.88
1999	1999-03-01	Summer	Ubatuba	Exposed	20m	23.7	28.5	35	5.7	3.21
1999	1999-03-01	Summer	Mar Virado	Sheltered	5m	29.2	30.2	32.3	3.2	5.93
1999	1999-03-01	Summer	Ubatuba	Sheltered	5m	29.8	30.2	33	3.8	5.74
1999	1999-03-01	Summer	Mar Virado	Sheltered	7,5m	29.7	30	31.3	2.9	5.37
1999	1999-03-01	Summer	Ubatumirim	Sheltered	7,5m	29.7	29.7	34.7	2.3	4.45
1999	1999-03-01	Summer	Ubatuba	Sheltered	7,5m	29.4	30.2	34.7	2.7	3.61
1999	1999-04-01	Autumn	Ubatumirim	Exposed	10m	26.6	28	35.7	0.9	4
1999	1999-04-01	Autumn	Ubatuba	Exposed	10m	23.2	29	37	0.9	4.83
1999	1999-04-01	Autumn	Ubatuba	Sheltered	10m	23.4	28.2	37	6.1	5.29
1999	1999-04-01	Autumn	Mar Virado	Exposed	10m	24.8	25	34	6.4	5.84
1999	1999-04-01	Autumn	Ubatumirim	Sheltered	10m	22.8	27.2	36	4.8	4.42
1999	1999-04-01	Autumn	Ubatumirim	Exposed	15m	22.5	26.2	36	1.2	3.84
1999	1999-04-01	Autumn	Ubatuba	Exposed	15m	21.7	28.5	37	7.7	3.99
1999	1999-04-01	Autumn	Ubatuba	Exposed	20m	20.2	27.8	37	1	3.21
1999	1999-04-01	Autumn	Mar Virado	Sheltered	10m	24	25.4	34.3	4.2	6.18
1999	1999-04-01	Autumn	Mar Virado	Exposed	15m	24.2	25	35.3	5.1	5.73
1999	1999-04-01	Autumn	Ubatuba	Sheltered	5m	25.8	28.7	37	9.2	5.74
1999	1999-04-01	Autumn	Mar Virado	Exposed	20m	22.4	25	37	5.2	4.28
1999	1999-04-01	Autumn	Mar Virado	Sheltered	5m	25.2	26.2	32.7	4.9	5.93
1999	1999-04-01	Autumn	Ubatuba	Sheltered	7,5m	24.7	27.8	36	3.4	3.61
1999	1999-04-01	Autumn	Mar Virado	Sheltered	7,5m	26	26.2	34	2.9	5.37
1999	1999-04-01	Autumn	Ubatumirim	Exposed	20m	19	27.2	36	0.7	1.53
1999	1999-04-01	Autumn	Ubatumirim	Sheltered	5m	26.7	28.2	35	9	4.88
1999	1999-04-01	Autumn	Ubatumirim	Sheltered	7,5m	27.8	28.2	35	2.4	4.45
1999	1999-05-01	Autumn	Ubatuba	Exposed	10m	24.7	24.7	36	0.9	4.83
1999	1999-05-01	Autumn	Ubatumirim	Exposed	10m	26.2	25.2	35	0.9	4
1999	1999-05-01	Autumn	Ubatuba	Sheltered	10m	24.8	25	36	6.1	5.29
1999	1999-05-01	Autumn	Mar Virado	Exposed	10m	25.2	25.4	34.3	6.4	5.84
1999	1999-05-01	Autumn	Mar Virado	Sheltered	10m	24.8	25	35	4.2	6.18
1999	1999-05-01	Autumn	Ubatumirim	Sheltered	10m	25.5	25.2	35	4.8	4.42
1999	1999-05-01	Autumn	Ubatuba	Exposed	15m	23.5	25.7	36	7.7	3.99
1999	1999-05-01	Autumn	Ubatuba	Exposed	20m	22.2	24.5	36	1	3.21
1999	1999-05-01	Autumn	Mar Virado	Exposed	15m	24.4	24.7	35	5.1	5.73
1999	1999-05-01	Autumn	Ubatuba	Sheltered	5m	25	25	35.3	9.2	5.74
1999	1999-05-01	Autumn	Mar Virado	Exposed	20m	24.2	25.2	35	5.2	4.28
1999	1999-05-01	Autumn	Ubatuba	Sheltered	7,5m	24.7	25.2	35.7	3.4	3.61
1999	1999-05-01	Autumn	Mar Virado	Sheltered	5m	25	25.2	35	4.9	5.93
1999	1999-05-01	Autumn	Mar Virado	Sheltered	7,5m	25	25	35	2.9	5.37
1999	1999-05-01	Autumn	Ubatumirim	Exposed	15m	24.7	25.4	35	1.2	3.84
1999	1999-05-01	Autumn	Ubatumirim	Exposed	20m	23.1	25.2	35	0.7	1.53
1999	1999-05-01	Autumn	Ubatumirim	Sheltered	5m	25.7	26.2	35	9	4.88
1999	1999-05-01	Autumn	Ubatumirim	Sheltered	7,5m	25.2	25.2	35	2.4	4.45
1999	1999-06-01	Autumn	Mar Virado	Exposed	10m	22	21.4	36	6.4	5.84
1999	1999-06-01	Autumn	Mar Virado	Sheltered	10m	21.8	21.2	36	4.2	6.18
1999	1999-06-01	Autumn	Ubatuba	Exposed	10m	22.4	22.5	36.7	0.9	4.83
1999	1999-06-01	Autumn	Ubatumirim	Exposed	10m	22	22.8	37	0.9	4
1999	1999-06-01	Autumn	Ubatumirim	Sheltered	10m	22	23	37	4.8	4.42
1999	1999-06-01	Autumn	Mar Virado	Exposed	15m	21.5	21.5	36	5.1	5.73
1999	1999-06-01	Autumn	Mar Virado	Exposed	20m	21.7	21.8	37	5.2	4.28
1999	1999-06-01	Autumn	Ubatuba	Sheltered	10m	22	22.2	35.7	6.1	5.29
1999	1999-06-01	Autumn	Ubatuba	Exposed	15m	22	21.7	36	7.7	3.99
1999	1999-06-01	Autumn	Ubatumirim	Exposed	15m	21.8	22	36.7	1.2	3.84
1999	1999-06-01	Autumn	Mar Virado	Sheltered	5m	21.8	21.2	35	4.9	5.93
1999	1999-06-01	Autumn	Ubatumirim	Exposed	20m	21.8	21.4	35.7	0.7	1.53
1999	1999-06-01	Autumn	Mar Virado	Sheltered	7,5m	22	21.4	35.3	2.9	5.37
1999	1999-06-01	Autumn	Ubatumirim	Sheltered	5m	22.2	23	36.3	9	4.88
1999	1999-06-01	Autumn	Ubatuba	Exposed	20m	21.8	21.5	37	1	3.21
1999	1999-06-01	Autumn	Ubatuba	Sheltered	5m	22.5	22.5	35.7	9.2	5.74
1999	1999-06-01	Autumn	Ubatuba	Sheltered	7,5m	22.2	22.7	35	3.4	3.61
1999	1999-06-01	Autumn	Ubatumirim	Sheltered	7,5m	22.5	22.2	36.3	2.4	4.45
1999	1999-07-01	Winter	Ubatumirim	Exposed	10m	22.2	22.8	34	1.8	4
1999	1999-07-01	Winter	Mar Virado	Exposed	10m	21	21.5	30.7	3.4	5.84
1999	1999-07-01	Winter	Mar Virado	Sheltered	10m	21.5	22.2	30.3	7.7	6.18
1999	1999-07-01	Winter	Mar Virado	Exposed	15m	21.5	21.5	32.3	2.4	5.73
1999	1999-07-01	Winter	Ubatuba	Exposed	10m	22	23.7	36.3	12.1	4.83
1999	1999-07-01	Winter	Mar Virado	Exposed	20m	21.2	21.4	34	0.7	4.28
1999	1999-07-01	Winter	Mar Virado	Sheltered	5m	21	22.5	30	8.5	5.93
1999	1999-07-01	Winter	Ubatuba	Sheltered	10m	22	23	36.3	10.9	5.29
1999	1999-07-01	Winter	Ubatumirim	Sheltered	10m	21.7	21.7	34.7	5	4.42
1999	1999-07-01	Winter	Ubatumirim	Exposed	15m	21.7	21.5	35.3	4.5	3.84
1999	1999-07-01	Winter	Mar Virado	Sheltered	7,5m	21.8	22	30.3	12.8	5.37
1999	1999-07-01	Winter	Ubatuba	Exposed	15m	21.7	22.7	36.3	2.2	3.99
1999	1999-07-01	Winter	Ubatumirim	Exposed	20m	21	21	35	0.4	1.53
1999	1999-07-01	Winter	Ubatuba	Exposed	20m	21.2	21.8	36.7	11.9	3.21
1999	1999-07-01	Winter	Ubatumirim	Sheltered	5m	22	22.7	34	3.3	4.88
1999	1999-07-01	Winter	Ubatumirim	Sheltered	7,5m	22	21.8	34	3.4	4.45
1999	1999-07-01	Winter	Ubatuba	Sheltered	5m	22.4	23	36.3	8	5.74
1999	1999-07-01	Winter	Ubatuba	Sheltered	7,5m	22.2	22.8	36.3	12.4	3.61
1999	1999-08-01	Winter	Ubatuba	Exposed	10m	20.7	21	34	12.1	4.83
1999	1999-08-01	Winter	Ubatuba	Sheltered	10m	20.7	21.2	34	10.9	5.29
1999	1999-08-01	Winter	Ubatumirim	Exposed	10m	21.2	22	35	1.8	4
1999	1999-08-01	Winter	Ubatuba	Exposed	15m	20.5	21.2	34	2.2	3.99
1999	1999-08-01	Winter	Ubatuba	Exposed	20m	20.5	20.5	35	11.9	3.21
1999	1999-08-01	Winter	Ubatuba	Sheltered	5m	21	21.5	33	8	5.74
1999	1999-08-01	Winter	Mar Virado	Exposed	10m	21.2	21.5	32	3.4	5.84
1999	1999-08-01	Winter	Ubatumirim	Sheltered	10m	21	21.4	34	5	4.42
1999	1999-08-01	Winter	Mar Virado	Sheltered	10m	21.3	23	33	7.7	6.18
1999	1999-08-01	Winter	Ubatumirim	Exposed	15m	20.5	21.2	35	4.5	3.84
1999	1999-08-01	Winter	Ubatuba	Sheltered	7,5m	20.7	22	33.3	12.4	3.61
1999	1999-08-01	Winter	Mar Virado	Exposed	15m	21	22.2	34	2.4	5.73
1999	1999-08-01	Winter	Mar Virado	Exposed	20m	21	21.4	34	0.7	4.28
1999	1999-08-01	Winter	Ubatumirim	Exposed	20m	21	20.4	35	0.4	1.53
1999	1999-08-01	Winter	Mar Virado	Sheltered	5m	21.2	22.2	32	8.5	5.93
1999	1999-08-01	Winter	Ubatumirim	Sheltered	5m	21.5	22.5	34.3	3.3	4.88
1999	1999-08-01	Winter	Ubatumirim	Sheltered	7,5m	21.8	22.5	34	3.4	4.45
1999	1999-08-01	Winter	Mar Virado	Sheltered	7,5m	22.2	22.2	30	12.8	5.37
1999	1999-09-01	Winter	Ubatumirim	Exposed	10m	22.4	22.7	35.3	1.8	4
1999	1999-09-01	Winter	Mar Virado	Exposed	10m	22.2	23	35	3.4	5.84
1999	1999-09-01	Winter	Ubatuba	Exposed	10m	22.5	22.5	34.3	12.1	4.83
1999	1999-09-01	Winter	Ubatumirim	Sheltered	10m	22.2	22.7	35	5	4.42
1999	1999-09-01	Winter	Ubatuba	Sheltered	10m	22	23	35	10.9	5.29
1999	1999-09-01	Winter	Ubatuba	Exposed	15m	22	23	35	2.2	3.99
1999	1999-09-01	Winter	Ubatuba	Exposed	20m	21.5	23	35	11.9	3.21
1999	1999-09-01	Winter	Mar Virado	Sheltered	10m	22.8	23	35	7.7	6.18
1999	1999-09-01	Winter	Ubatumirim	Exposed	15m	21.5	22	36	4.5	3.84
1999	1999-09-01	Winter	Mar Virado	Exposed	15m	22.2	23	35	2.4	5.73
1999	1999-09-01	Winter	Ubatuba	Sheltered	5m	22.4	23.2	35	8	5.74
1999	1999-09-01	Winter	Ubatumirim	Exposed	20m	20.5	22.5	37	0.4	1.53
1999	1999-09-01	Winter	Ubatumirim	Sheltered	5m	22.5	23.5	35	3.3	4.88
1999	1999-09-01	Winter	Ubatuba	Sheltered	7,5m	22	22.5	35	12.4	3.61
1999	1999-09-01	Winter	Mar Virado	Exposed	20m	21.2	22	36	0.7	4.28
1999	1999-09-01	Winter	Ubatumirim	Sheltered	7,5m	23	24	35	3.4	4.45
1999	1999-09-01	Winter	Mar Virado	Sheltered	5m	23.7	24.2	36	8.5	5.93
1999	1999-09-01	Winter	Mar Virado	Sheltered	7,5m	24.2	25	34.3	12.8	5.37
1999	1999-10-01	Spring	Mar Virado	Exposed	10m	20	22	34	0.6	5.84
1999	1999-10-01	Spring	Mar Virado	Sheltered	10m	19	22	33	2	6.18
1999	1999-10-01	Spring	Mar Virado	Exposed	15m	18.4	22.4	34	5.4	5.73
1999	1999-10-01	Spring	Mar Virado	Exposed	20m	18	20.5	34	0.8	4.28
1999	1999-10-01	Spring	Ubatuba	Exposed	10m	21.5	23.5	35	3.3	4.83
1999	1999-10-01	Spring	Ubatumirim	Exposed	10m	21.7	22	34.7	1.6	4
1999	1999-10-01	Spring	Ubatumirim	Sheltered	10m	21.5	21.5	35	0.4	4.42
1999	1999-10-01	Spring	Mar Virado	Sheltered	5m	19.5	22	33	4.1	5.93
1999	1999-10-01	Spring	Ubatuba	Sheltered	10m	20.5	23	35	4.8	5.29
1999	1999-10-01	Spring	Ubatuba	Exposed	15m	20.4	24	35.3	2.5	3.99
1999	1999-10-01	Spring	Mar Virado	Sheltered	7,5m	21	22	32.3	2.9	5.37
1999	1999-10-01	Spring	Ubatumirim	Exposed	15m	20	22	35	5.2	3.84
1999	1999-10-01	Spring	Ubatumirim	Exposed	20m	20	23.2	35.3	1	1.53
1999	1999-10-01	Spring	Ubatuba	Exposed	20m	20	22	35	0.9	3.21
1999	1999-10-01	Spring	Ubatuba	Sheltered	5m	22.2	24.4	34	4.3	5.74
1999	1999-10-01	Spring	Ubatumirim	Sheltered	5m	21.5	23	34	3	4.88
1999	1999-10-01	Spring	Ubatuba	Sheltered	7,5m	21.5	24	35	1	3.61
1999	1999-10-01	Spring	Ubatumirim	Sheltered	7,5m	23	23.4	33.3	7.5	4.45
1999	1999-11-01	Spring	Mar Virado	Exposed	10m	18.5	20	36	0.6	5.84
1999	1999-11-01	Spring	Ubatuba	Exposed	10m	18	21	35.3	3.3	4.83
1999	1999-11-01	Spring	Ubatumirim	Exposed	10m	20	21.5	37	1.6	4
1999	1999-11-01	Spring	Ubatuba	Sheltered	10m	17	20.5	36.7	4.8	5.29
1999	1999-11-01	Spring	Mar Virado	Sheltered	10m	18.2	21	35.3	2	6.18
1999	1999-11-01	Spring	Ubatuba	Exposed	15m	17.5	20.5	36.7	2.5	3.99
1999	1999-11-01	Spring	Ubatumirim	Sheltered	10m	18	21	37	0.4	4.42
1999	1999-11-01	Spring	Ubatumirim	Exposed	15m	17	21	37	5.2	3.84
1999	1999-11-01	Spring	Ubatuba	Exposed	20m	17	20	37	0.9	3.21
1999	1999-11-01	Spring	Ubatuba	Sheltered	5m	20	21.5	35.3	4.3	5.74
1999	1999-11-01	Spring	Mar Virado	Exposed	15m	17.5	20	37	5.4	5.73
1999	1999-11-01	Spring	Mar Virado	Exposed	20m	17	19	36	0.8	4.28
1999	1999-11-01	Spring	Mar Virado	Sheltered	5m	19	20.5	36	4.1	5.93
1999	1999-11-01	Spring	Ubatuba	Sheltered	7,5m	18	21	36	1	3.61
1999	1999-11-01	Spring	Ubatumirim	Exposed	20m	18	20	37	1	1.53
1999	1999-11-01	Spring	Ubatumirim	Sheltered	5m	20	22	36.7	3	4.88
1999	1999-11-01	Spring	Mar Virado	Sheltered	7,5m	20.5	21	34.7	2.9	5.37
1999	1999-11-01	Spring	Ubatumirim	Sheltered	7,5m	21	22	35.3	7.5	4.45
1999	1999-12-01	Spring	Ubatumirim	Exposed	10m	19	25.5	32	1.6	4
1999	1999-12-01	Spring	Mar Virado	Exposed	10m	17.7	23.5	35	0.6	5.84
1999	1999-12-01	Spring	Ubatuba	Exposed	10m	18.7	21.5	35	3.3	4.83
1999	1999-12-01	Spring	Ubatumirim	Sheltered	10m	17	23.7	33.3	0.4	4.42
1999	1999-12-01	Spring	Ubatumirim	Exposed	15m	16.8	24.5	33	5.2	3.84
1999	1999-12-01	Spring	Mar Virado	Sheltered	10m	18	24	35.3	2	6.18
1999	1999-12-01	Spring	Ubatuba	Sheltered	10m	18.7	22.4	34.7	4.8	5.29
1999	1999-12-01	Spring	Mar Virado	Exposed	15m	17.5	24	35.3	5.4	5.73
1999	1999-12-01	Spring	Mar Virado	Exposed	20m	16.5	23.2	35.3	0.8	4.28
1999	1999-12-01	Spring	Ubatuba	Exposed	15m	17.5	21	35	2.5	3.99
1999	1999-12-01	Spring	Ubatuba	Exposed	20m	16.5	22	35	0.9	3.21
1999	1999-12-01	Spring	Ubatumirim	Exposed	20m	16	22.2	33	1	1.53
1999	1999-12-01	Spring	Ubatumirim	Sheltered	5m	18.8	24.5	32	3	4.88
1999	1999-12-01	Spring	Mar Virado	Sheltered	5m	20.5	24	34	4.1	5.93
1999	1999-12-01	Spring	Ubatuba	Sheltered	5m	22	22.7	33	4.3	5.74
1999	1999-12-01	Spring	Ubatuba	Sheltered	7,5m	21.7	22	33	1	3.61
1999	1999-12-01	Spring	Ubatumirim	Sheltered	7,5m	22	24	28	7.5	4.45
1999	1999-12-01	Spring	Mar Virado	Sheltered	7,5m	22.4	24.5	32	2.9	5.37
